# Supplementary material
Source: PubMed Central journal article supplement (PMC3927720)
Supplement: NIHMS523555-supplement-01.pdf [file NIHMS523555-supplement-01.pdf]

## Supplemental information

**Table S1. Mutant alleles and transgenes used in this study**

A. Mutant alleles

| Allele              | Reference               |
|---------------------|-------------------------|
| <i>sax-7(nj48)</i>  | (Sasakura et al., 2005) |
| <i>dma-1(wy686)</i> | (Liu and Shen, 2012)    |
| <i>mnr-1(wy758)</i> | This study              |

B. Integrated transgenes

| Allele         | Chromosome | Constructs     | Co-injection marker    |
|----------------|------------|----------------|------------------------|
| <i>wyIs378</i> | X          | pOL020, pOL090 |                        |
| <i>wyIs369</i> | IV         | pOL071         | <i>Pmyo-2::mCherry</i> |

C. Extrachromosomal arrays

| Allele          | Constructs                    | Co-injection marker    |
|-----------------|-------------------------------|------------------------|
| <i>wyEx3869</i> | pRP13                         | <i>Pmyo-2::mCherry</i> |
| <i>wyEx4003</i> | Engineered fosmid WRM063aC06  | <i>Podr-1::gfp</i>     |
| <i>wyEx5668</i> | pXD65                         | <i>Podr-1::gfp</i>     |
| <i>wyEx5776</i> | Engineered fosmid WRM0618aD06 | <i>Podr-1::gfp</i>     |
| <i>wyEx5134</i> | pXD13+pXD26+pOL036            | <i>Podr-1::rfp</i>     |
| <i>wyEx5781</i> | pXD38+pXD86+pOL036            | <i>Podr-1::gfp</i>     |
| <i>wyEx5937</i> | pXD86                         | <i>Pmyo-2::mCherry</i> |
| <i>wyEx5950</i> | pXD20+pXD97                   | <i>Podr-1::gfp</i>     |
| <i>wyEx5946</i> | pXD105+pXD106                 | <i>Podr-1::gfp</i>     |
| <i>wyEx5948</i> | pXD86+pXD97+pXD105+pXD106     | <i>Podr-1::gfp</i>     |
| <i>wyEx4897</i> | pOL036+pOL057                 | <i>Podr-1::rfp</i>     |
| <i>wyEx5938</i> | pXD103                        | <i>Podr-1::gfp</i>     |
| <i>wyEx6039</i> | pXD118                        | <i>Podr-1::rfp</i>     |
| <i>wyEx4286</i> | pOL035                        | <i>Podr-1::rfp</i>     |
| <i>wyEx5790</i> | pXD46+pOL036                  | <i>Podr-1::gfp</i>     |
| <i>wyEx6034</i> | pXD91+pOL036                  | <i>Podr-1::rfp</i>     |

**Table S2. Plasmids used in this study**

A. Plasmids

| Plasmid | Description                   | Note |
|---------|-------------------------------|------|
| pOL020  | <i>ser2prom3::myr-gfp</i>     |      |
| pOL035  | <i>ser2prom3::dma-1::gfp</i>  |      |
| pOL036  | <i>ser2prom3::myr-mCherry</i> |      |
| pOL057  | <i>Pdpy-7::sax-7s::gfp</i>    |      |
| pOL071  | <i>Pnhr-81::sax-7s</i>        |      |
| pOL090  | <i>Prab-3::myr-mCherry</i>    |      |

|        |                               |                                                                                                                                                                                                                  |
|--------|-------------------------------|------------------------------------------------------------------------------------------------------------------------------------------------------------------------------------------------------------------|
| pRP13  | <i>Pdpy-7::sax-7s</i>         | A gift of Oliver Hobert. (Pocock et al., 2008)                                                                                                                                                                   |
| pXD13  | <i>Prab-3::cfp</i>            |                                                                                                                                                                                                                  |
| pXD20  | <i>Pmec-17::BFP</i>           |                                                                                                                                                                                                                  |
| pXD26  | <i>Pdpy-7::sax-7s::yfp</i>    |                                                                                                                                                                                                                  |
| pXD38  | <i>Pmec-17::sax-7s::yfp</i>   |                                                                                                                                                                                                                  |
| pXD46  | <i>Pdpy-7::sax-7sΔIg</i>      | All 4 Ig domains of SAX-7 deleted by yeast recombineering using primers 5'-ttctgtcacaagtttgaaccacgcagagtgaacagccacaggaacatcattcacgtactgctctgttgg -3' and 5'-gatgttctgtggctgttca-3' (Kevin R. et al., 1997)       |
| pXD65  | <i>Pdpy-7::mnr-1</i>          | cDNA of mnr-1 cloned with primers 5'-ATGATGATATCAATACTATTGGTTT -3' and 5'-TTAAAGTAGGTAGATCATTAGGAG -3'                                                                                                           |
| pXD86  | <i>Pmec-17::mnr-1</i>         |                                                                                                                                                                                                                  |
| pXD91  | <i>Pdpy-7::sax-7sΔFnIII</i>   | All 5 FnIII domains of SAX-7 deleted by yeast recombineering using primers 5'-aacatcctaaattgaatttga -3' and 5'-ctaaattggatcaagttgaaaaggaaatcaaaattcaatttaaggatgttggtgaaacgacgaaaacgt -3' (Kevin R. et al., 1997) |
| pXD97  | <i>Pmec-17::sax-7s</i>        |                                                                                                                                                                                                                  |
| pXD103 | <i>Pdpy-7::mnr-1ΔTM</i>       |                                                                                                                                                                                                                  |
| pXD105 | <i>Punc-47::mnr-1</i>         |                                                                                                                                                                                                                  |
| pXD106 | <i>Punc-47::sax-7s</i>        |                                                                                                                                                                                                                  |
| pXD118 | <i>Pdpy-7::mCherry::mnr-1</i> |                                                                                                                                                                                                                  |

#### B. Engineered fosmids

| Construct                               | Original fosmid |
|-----------------------------------------|-----------------|
| <i>Psax-7::sax-7::gfp::sl2::mCherry</i> | WRM063aC06      |
| <i>Pmnr-1::mnr-1::gfp::sl2::mCherry</i> | WRM0618aD06     |

**Table S3. S2 cell aggregation assay**

#### A. Plasmids used in S2 cell transfection

| Plasmid | Description                           |
|---------|---------------------------------------|
| pAWG    | <i>Pactin::gfp</i>                    |
| pAWR    | <i>Pactin::rfp</i>                    |
| pXD49   | <i>Pactin::sax-7s::gfp</i>            |
| pXD54   | <i>Pactin::dma-1::rfp</i>             |
| pXD85   | <i>Pactin::mnr-1::gfp</i>             |
| pXD53   | <i>Pactin::sax-7s::HA</i>             |
| pXD95   | <i>Pactin::dma-1 ecto-domain::myc</i> |
| pXD84   | <i>Pactin::mnr-1::Flag</i>            |

|        |                                  |
|--------|----------------------------------|
| pXD130 | <i>Pactin::sax-7sΔIg::gfp</i>    |
| pXD116 | <i>Pactin::sax-7sΔFnIII::gfp</i> |

B. S2 cell aggregation assay

| Green cells                                     | Red cells          | Result         |
|-------------------------------------------------|--------------------|----------------|
| GFP (pAWG)                                      | DMA-1::RFP (pXD54) | No aggregation |
| SAX-7::GFP(pXD49)                               | RFP (pAWR)         | No aggregation |
| MNR-1::GFP(pXD85)                               | RFP (pAWR)         | No aggregation |
| SAX-7::FP(pXD49)                                | DMA-1::RFP (pXD54) | No aggregation |
| MNR-1::GFP(pXD85)                               | DMA-1::RFP (pXD54) | No aggregation |
| SAX-7::GFP(pXD49)<br>+ MNR-1::GFP(pXD85)        | DMA-1::RFP (pXD54) | Aggregation    |
| SAX-7ΔIg::GFP(pXD130)<br>+ MNR-1::GFP(pXD85)    | DMA-1::RFP (pXD54) | Aggregation    |
| SAX-7ΔFnIII::GFP(pXD116)<br>+ MNR-1::GFP(pXD85) | DMA-1::RFP (pXD54) | No aggregation |

**Supplemental figure legends**

**Figure S1. Phylogenetic analysis of MNR-1 and schematic structures of SAX-7, MNR-1 and DMA-1 proteins. Related to Figure 1.**

(A) Phylogenetic tree of *C. elegans* MNR-1 and its orthologues in other species. (B) Schematic of SAX-7, MNR-1 and DMA-1 proteins. Ig: Immunoglobulin domain. FnIII: Fibronectin III domain. F: FERM binding motif. A: Ankyrin binding motif. P: PDZ binding motif. LRR: Leucine rich repeat. LRR-NT: LRR N-terminal domain. LRR-CT: LRR C-terminal domain.

**Figure S2. SAX-7 was expressed and localized early in development independent of MNR-1 or PVD dendrites. Related to Figure 2 and Figure 3.**

(A-B) SAX-7 was expressed and subcellularly localized in hypodermal cells in (A) L2 and (B) L3 stages. (C-E) The expression and localization of SAX-7 did not depend on MNR-1 or PVD dendrites. (C) Fluorescent image showing disrupted PVD morphology in *mnr-1(wy758)* mutant. (D) SAX-7 localization in the hypodermal cells revealed by *Pdpy-7::sax-7s::gfp* was not altered in *mnr-1(wy758)* mutants despite the largely abnormal PVD structure. (E) Overlay of (C) and (D). Scale bar: 10μm

**Figure S3. MNR-1 was partially secreted. Related to Figure 5.**

(A) Expressing MNR-1 without its transmembrane domain partially rescued the “T” formation phenotype of *mnr-1(wy758)*. (B) Full length MNR-1 tagged with mCherry at its N-terminus could be detected in the ceolomocytes. Arrowheads: Ceolomocytes.

**Figure S4. PVD dendrites in *dma-1* mutants did not follow PLM and ALM neurons expressing SAX-7 and MNR-1. Related to Figure 6.**

(A-C) PLM overexpression of SAX-7 and MNR-1 failed to alter dendritic morphology in *dma-1(wy686)* mutants. (A) PLM and ALM neurons labeled by *Pmec-17::sax-7::yfp*. (B) Dendritic structure of *dma-1(wy686)* mutant worms was unaltered by overexpression of SAX-7 and MNR-1. No additional T's were formed when 2° PVD dendrites made contact with the PLM and ALM neurons. (C) Overlay between (A) and (B). Scale bar: 10 μm.

**Figure S5. DMA-1 was the neuronal receptor for SAX-7 and MNR-1. Related to Figure 6.**

(A) PVD dendritic phenotype of *dma-1(wy686); mnr-1(wy758)* mutants were identical to that of *dma-1(wy686)* single mutants. (B) PVD dendritic phenotype of *dma-1(wy686); sax-7(nj48); mnr-1(wy758)* mutants were identical to that of *dma-1(wy686)* single mutants. (C) Over-expressing DMA-1 in PVD caused overbranching. (D-E) PVD morphology of *sax-7(nj48)* mutant (D) or *mnr-1(wy758)* mutant (E) was not altered by DMA-1 overexpression. Scale bar: 10 μm.

**Figure S6. Structure-function analysis of SAX-7. Related to Figure 7.**

(A) Summary of structure-function analysis of SAX-7. (B) SAX-7ΔIg could rescue the PVD dendrite phenotype of *sax-7(nj48)* mutant. Scale bar: 10μm (C) SAX-7ΔFnIII failed to rescue. (D) S2 cells transfected with *sax-7ΔIg::gfp* and *mnr-1::gfp* strongly aggregated with cells expressing DMA-1-RFP. Scale bar: 100 μm (E) Cells transfected with *sax-7ΔFnIII::gfp* and *mnr-1::gfp* failed to aggregate with cells expressing DMA-1-RFP. (F) Schematic representation of proposed model: SAX-7 and MNR-1 formed pre-patterned lines in hypodermal cell (left). When PVD 2° branches expressing DMA-1 reached the SAX-7 and MNR-1 enriched line (middle), 3° branches formed and grew along the pre-patterned line. Thus the precise location of branch formation and growth direction was specified through interaction between pre-patterned cell adhesion molecules and their neuronal receptor.

**Movies S1-S4. Time-lapse movies of PVD dendrite development. Related to Figure 4.**

- S1. Development of WT PVD.
- S2. Development of PVD dendrites in *sax-7(nj48)* mutant.
- S3. Development of PVD dendrites in *mnr-1(wy758)* mutant.
- S4. Development of PVD dendrites in *dma-1(wy686)* mutant

**Supplemental experimental procedures**

**Fluorescence microscopy and confocal imaging**

Images of fluorescent proteins were captured in live animals using a Plan-Apochromat 40x/1.3 objective on a Zeiss LSM710 confocal microscope (Carl Zeiss). Worms were immobilized on 2% agarose pads using a mixture of 225 mM 2,3-butanedione monoxime and 2.5 mM levamisole (Sigma-Aldrich). Z-stacks were collected and the maximum intensity projection was used for additional analysis.

### **S2 cell aggregation and co-IP assays**

S2 cells were transfected with *Pactin::sax-7::gfp*, *Pactin::mnr-1::gfp*, *Pactin::sax-7::gfp* +*Pactin::mnr-1::gfp*, or *Pactin::dma-1::rfp*. Cells transfected with *Pactin::gfp* and *Pactin::rfp* were used as controls. 3 days after transfection, cells were washed with 5 ml phosphate buffered saline (PBS) and resuspended in S2 medium at  $10^6$  cell/ml. 500  $\mu$ L of green cells were mixed with 500  $\mu$ L red cells and rotated at 30 rpm for 3 hours at room temperature. 3  $\mu$ L of each mixture was immediately spotted on glass slides for imaging and quantification.

Similarly, for co-IP assays S2 cells were transfected with *Pactin::sax-7::HA*, *Pactin::mnr-1::FLAG*, both *Pactin::sax-7::HA* and *Pactin::mnr-1::FLAG*, or *Pactin::dma-1::ecto-myc*. 3 days after transfection, cells transfected with SAX-7 and/or MNR-1 were collected and lysed in lysis buffer (50mM Tris-HCl pH 7.4, 10mM MgCl<sub>2</sub>, 150mM NaCl, 1mM EGTA, 10% Glycerol, 0.5% Nonidet P-40 and protease inhibitor (Roche)). Cultured medium from *Pactin::dma-1::ecto-myc* transfected cells was collected. The cell lysates or cultured medium containing the desired proteins were mixed with anti-HA antibody coated agarose beads (Sigma) and incubated at 4°C for 3 hours with rotation and washed thoroughly with lysis buffer. Proteins were eluted at 65°C using 2% SDS elution buffer and detected using western blot analysis with mouse antibody to HA (1:1000, Roche), rabbit antibody to Myc (1:2000, Santa Cruz Biotechnology), mouse antibody to FLAG (1:5000, Sigma) and HRP-conjugated goat antibodies to mouse or rabbit (1:20,000, Jackson Immuno Research).

### **Supplemental references**

- Kevin R., O., Vo, K.T., Michaelis, S., and Paddon, C. (1997). Recombination-mediated PCR-directed plasmid construction in vivo in yeast. *Nucleic Acids Research* 25, 451-452.
- Liu, O.W., and Shen, K. (2012). The transmembrane LRR protein DMA-1 promotes dendrite branching and growth in *C. elegans*. *Nat Neurosci* 15, 57-63.
- Pocock, R., Bénard, C.Y., Shapiro, L., and Hobert, O. (2008). Functional dissection of the *C. elegans* cell adhesion molecule SAX-7, a homologue of human L1. *Molecular and Cellular Neuroscience* 37, 56-68.
- Sasakura, H., Inada, H., Kuhara, A., Fusaoka, E., Takemoto, D., Takeuchi, K., and Mori, I. (2005). Maintenance of neuronal positions in organized ganglia by SAX-7, a *Caenorhabditis elegans* homologue of L1. *EMBO J* 24, 1477-1488.
