# Supplementary material
Source: PubMed Central journal article supplement (PMC3927720)

A

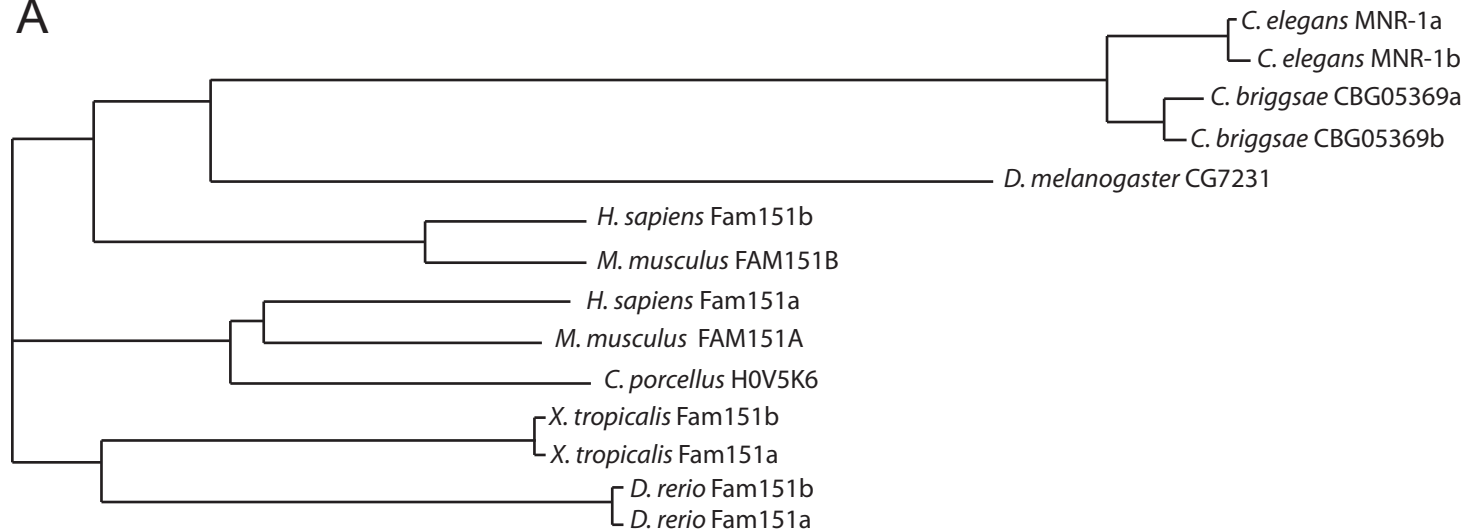

B

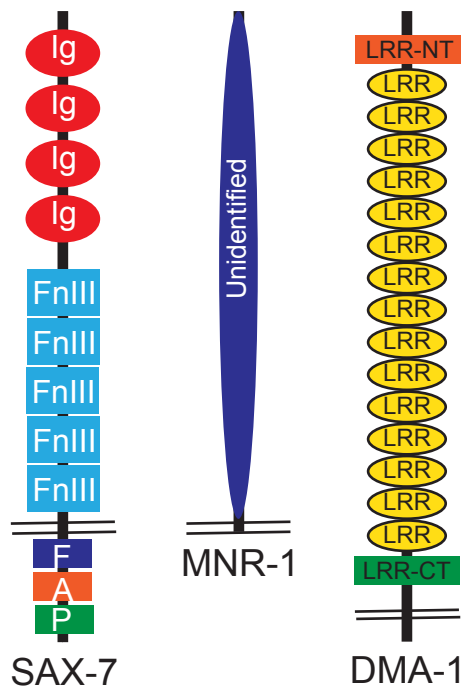

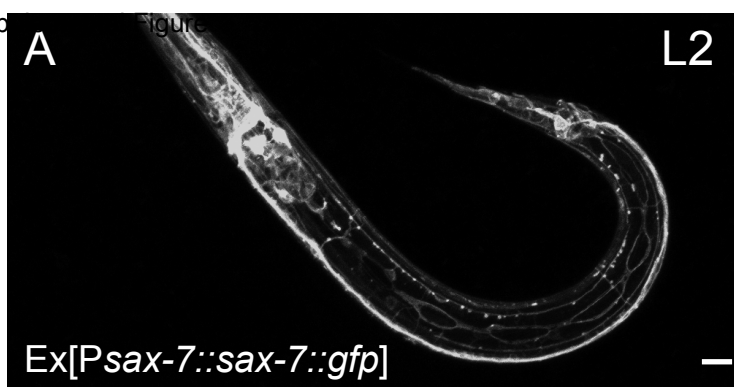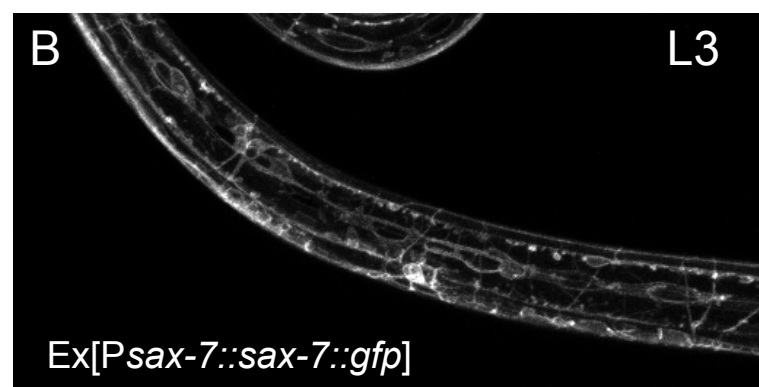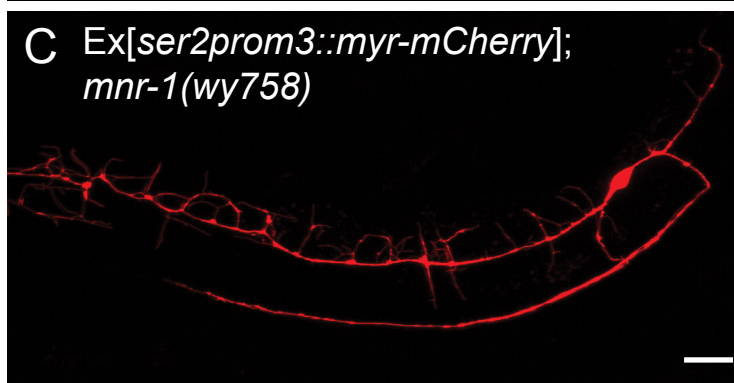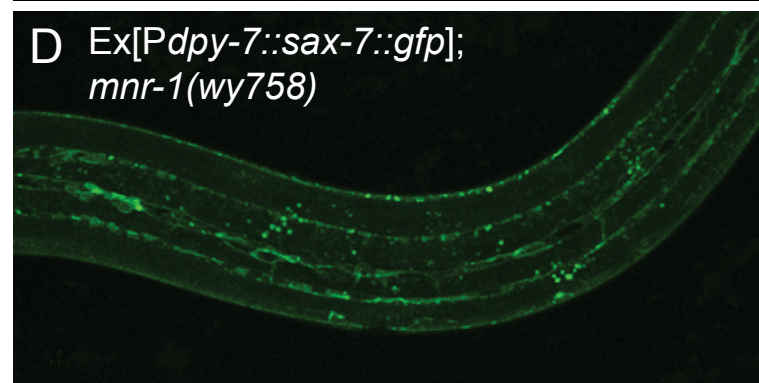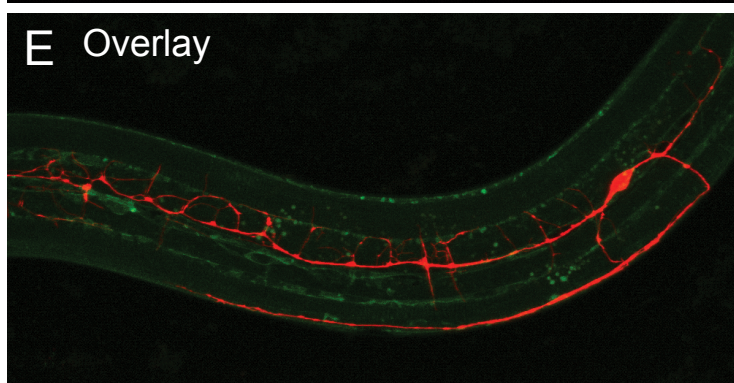

Sup

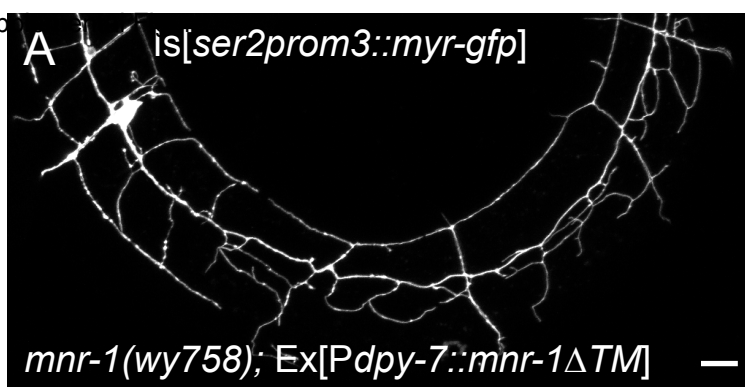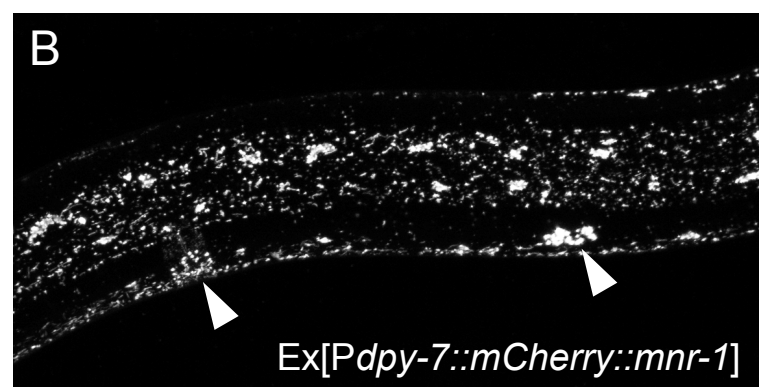

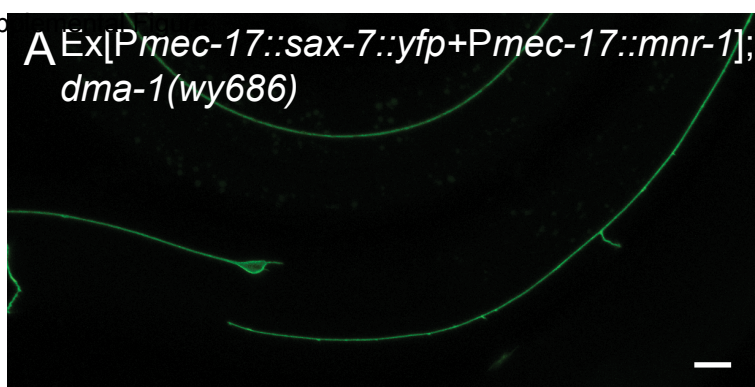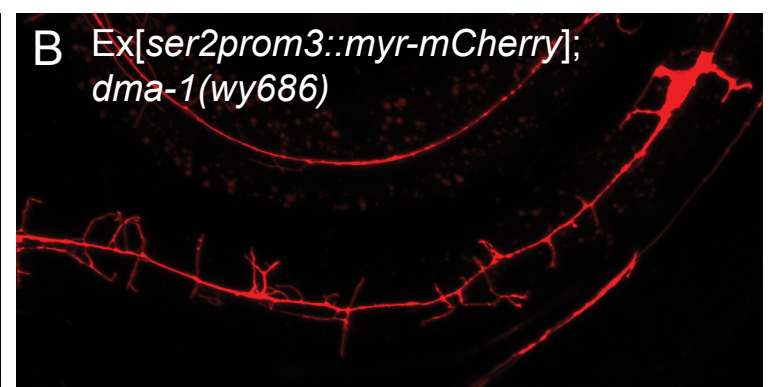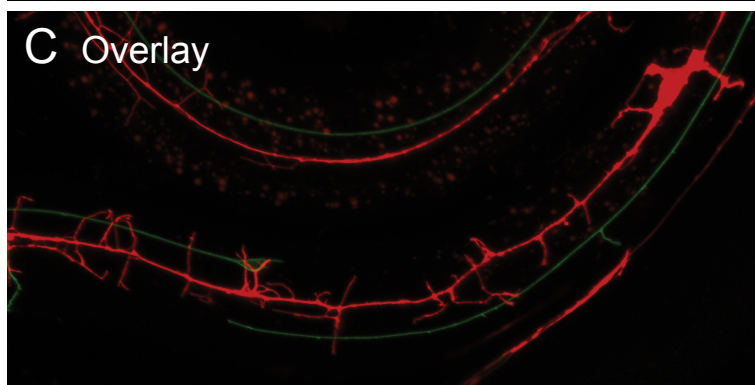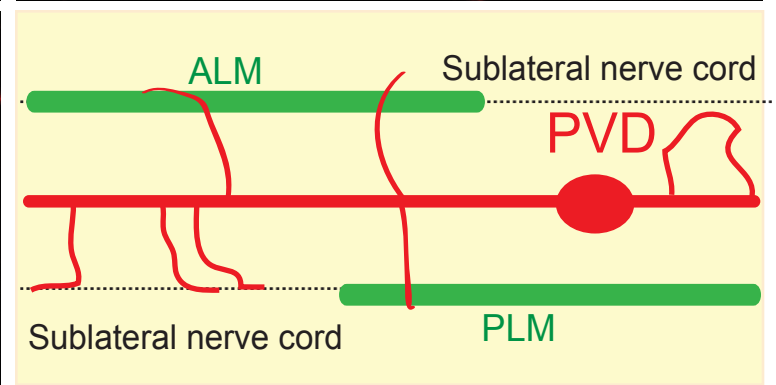



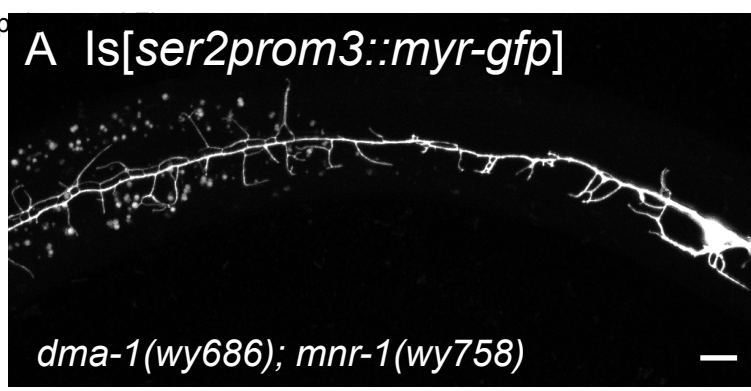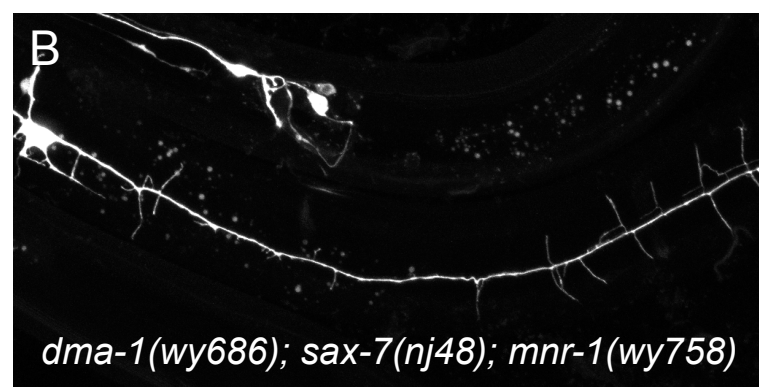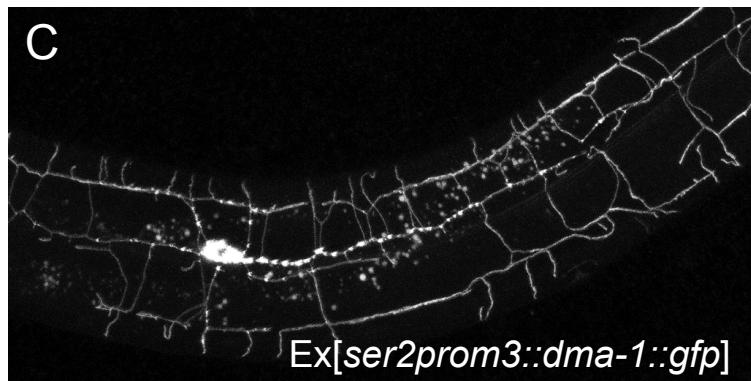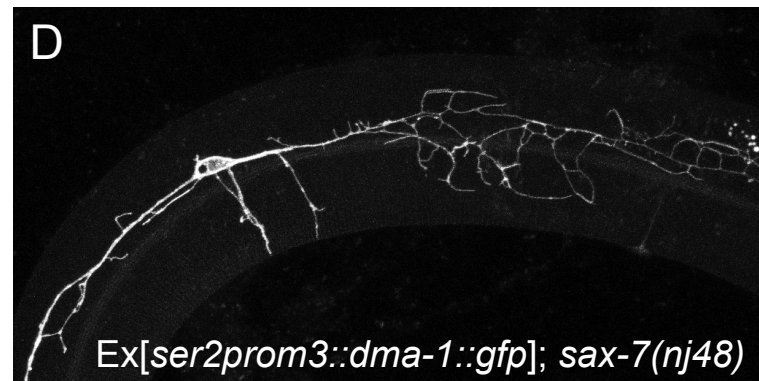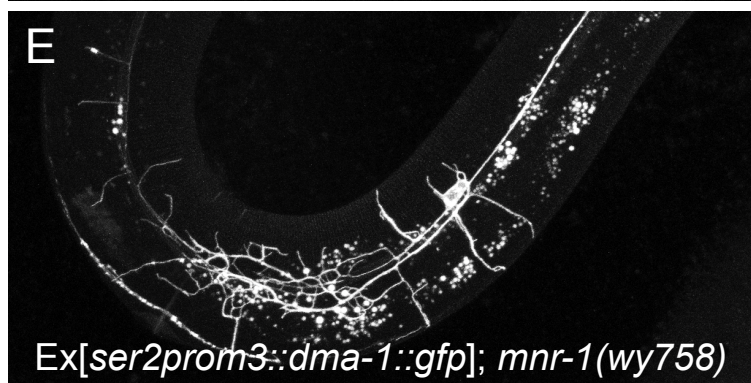

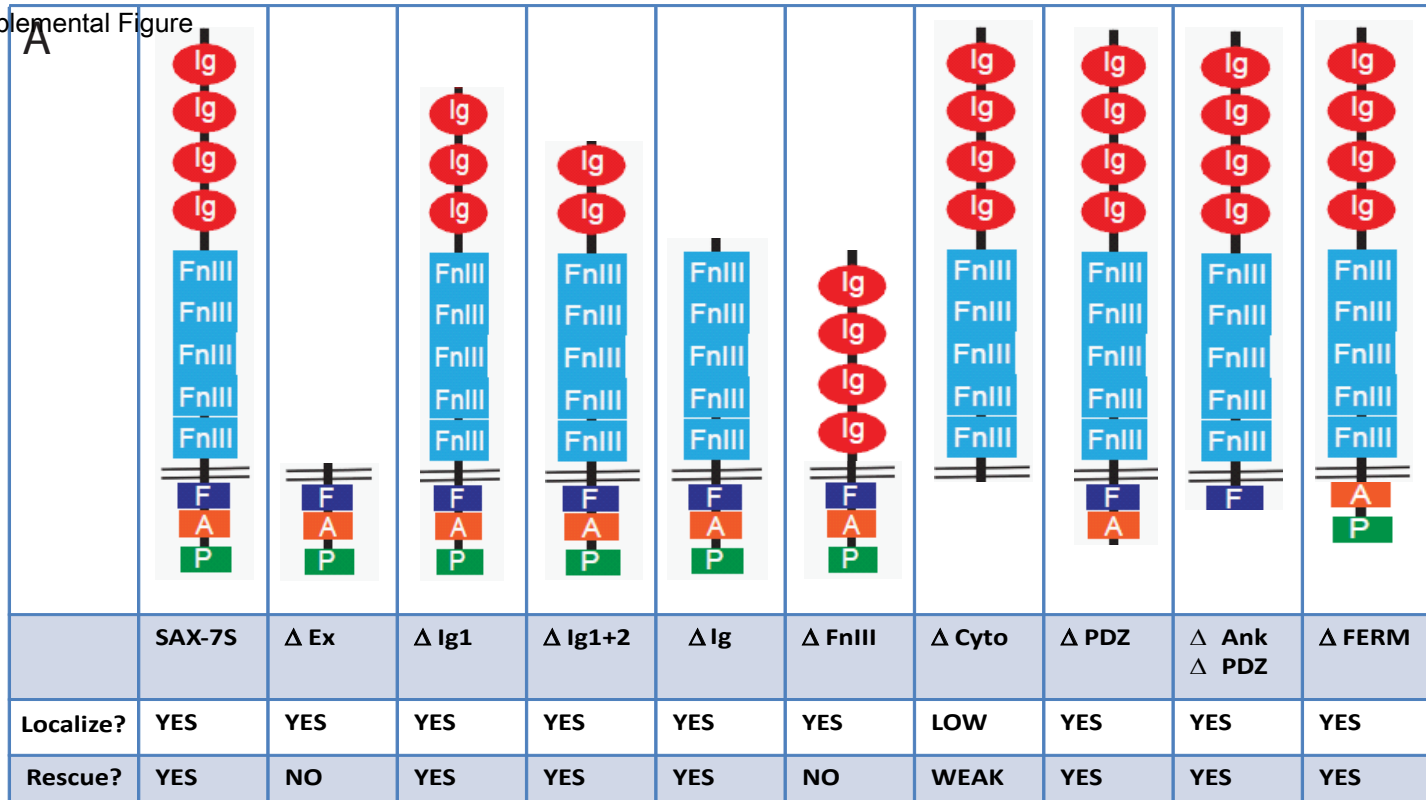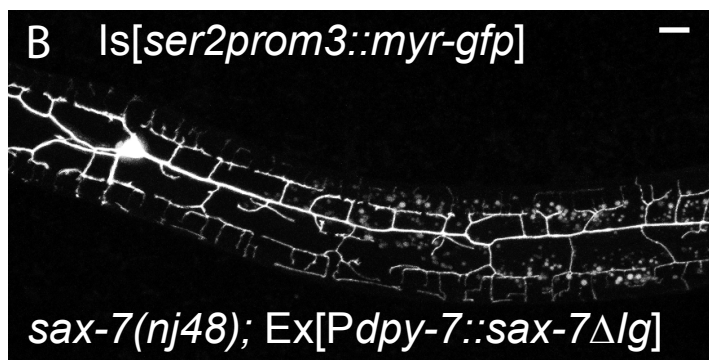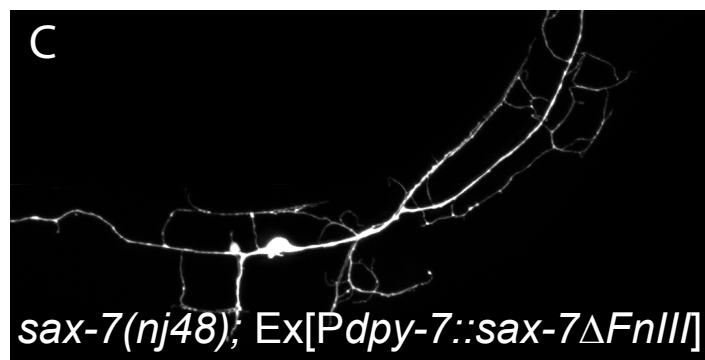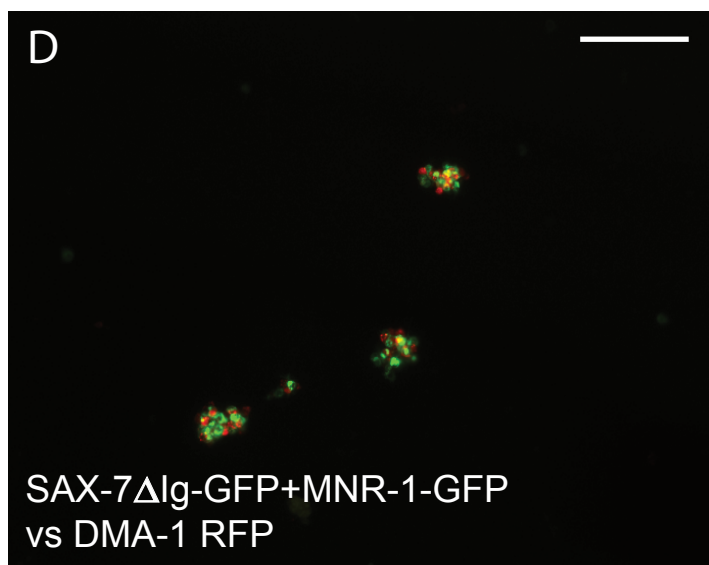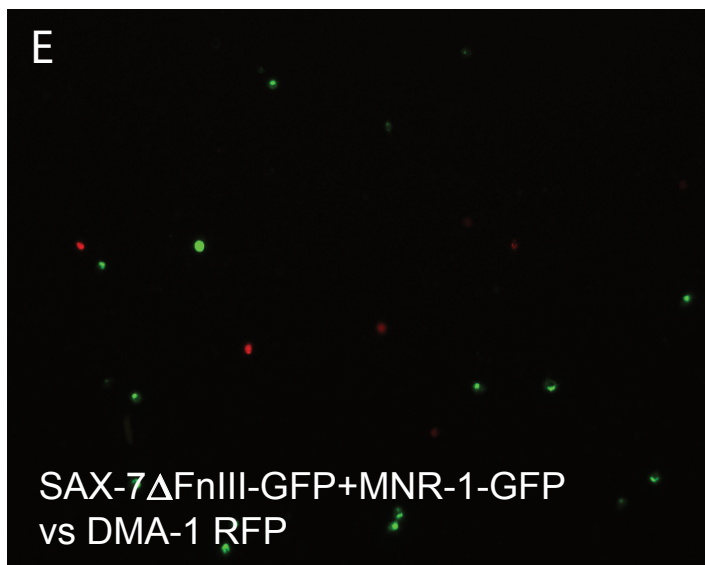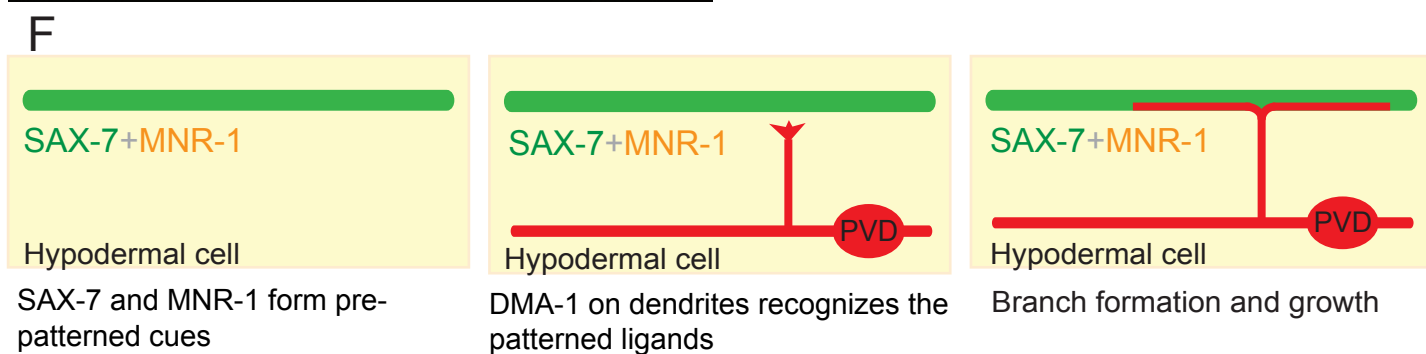

Supplement: NIHMS523555-supplement-02.pdf [file NIHMS523555-supplement-02.pdf]
